# Supplementary material for: The Source and Evolutionary History of a Microbial Contaminant Identified Through Soil Metagenomic Analysis
Source: PubMed Central journal article supplement (PMC5358914; doi:10.1128/mbio.01969-16), 2017-02-21

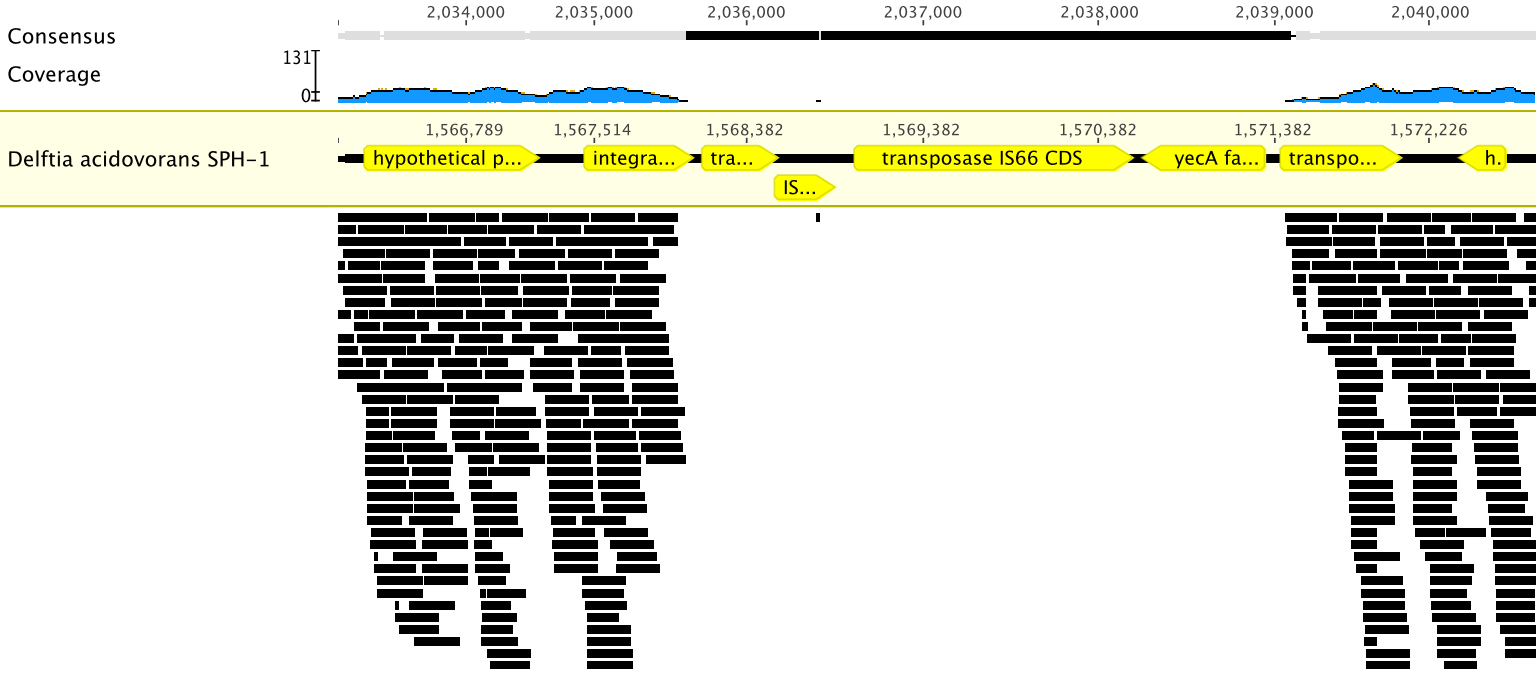

Supplement: mbo001173203sf1.pdf [file mbo001173203sf1.pdf]
